# Supplementary material for: Phyto-Computational Intervention of Diabetes Mellitus at Multiple Stages Using Isoeugenol from Ocimum tenuiflorum: A Combination of Pharmacokinetics and Molecular Modelling Approaches
Source: MDPI journal article supplement (doi:10.3390/molecules27196222), 2022-09-22
Supplement: s1 [file s1]

## Supplementary Material

**Supplementary Table S1:** ADMET screening of *O. tenuiflorum* compounds obtained from IMPPAT database

| Sl.No | Compound Names                                 | Oral bioavailability (OB≥30%) | Blood-brain barrier (BBB) | Drug half-life (HL<3h) | Lipinski's rule (LR) of five | Intestinal epithelial permeability (Caco-2 cells) | Drug-induced liver injury (DILI) | Clearness (CL>15 ml/min/kg) | Molecular Weight (MW 100~600) | Hydrogen bond acceptor (0~12) | Hydrogen bond donar (0~7) | TPSA (0~140) | PAINS   |
|-------|------------------------------------------------|-------------------------------|---------------------------|------------------------|------------------------------|---------------------------------------------------|----------------------------------|-----------------------------|-------------------------------|-------------------------------|---------------------------|--------------|---------|
| 1     | Cyclo(L-Val-L-Leu)                             | PASS                          | PASS                      | 0.671                  | Accepted                     | -4.711                                            | Negative                         | 5.356                       | 212.150                       | 4                             | 2                         | 58.200       | 0       |
| 2     | α-Cubebene                                     | Fail                          | PASS                      | 0.052                  | Accepted                     | -4.408                                            | Negative                         | 18.693                      | 204.190                       | 0                             | 0                         | 0.000        | 0       |
| 3     | β-Caryophyllone                                | Moderate                      | PASS                      | 0.227                  | Accepted                     | -4.750                                            | Negative                         | 14.774                      | 220.180                       | 1                             | 0                         | 17.070       | 0       |
| 4     | Phytosterols                                   | PASS                          | PASS                      | 0.013                  | Accepted                     | -4.756                                            | Negative                         | 16.686                      | 414.390                       | 1                             | 1                         | 20.230       | 0       |
| 5     | UNII-0V56HXQ8N5                                | Moderate                      | Moderate                  | 0.059                  | Accepted                     | -4.357                                            | Negative                         | 19.832                      | 204.190                       | 0                             | 0                         | 0.000        | 0       |
| 6     | (-)-Alloaromadendrene                          | PASS                          | PASS                      | 0.040                  | Accepted                     | -4.577                                            | Negative                         | 13.563                      | 204.190                       | 0                             | 0                         | 0.000        | 0       |
| 7     | (-)-Camphene                                   | PASS                          | PASS                      | 0.077                  | Accepted                     | -4.463                                            | Negative                         | 9.346                       | 136.130                       | 0                             | 0                         | 0.000        | 0       |
| 8     | (-)-Cis-Carveol                                | Fail                          | PASS                      | 0.378                  | Accepted                     | -4.328                                            | Negative                         | 12.624                      | 152.120                       | 1                             | 1                         | 20.230       | 0       |
| 9     | (-)-Linalool                                   | PASS                          | PASS                      | 0.493                  | Accepted                     | -4.375                                            | Negative                         | 9.738                       | 154.140                       | 1                             | 1                         | 20.230       | 0       |
| 10    | (+)-α-Phellandrene                             | PASS                          | PASS                      | 0.617                  | Accepted                     | -4.383                                            | Negative                         | 12.660                      | 136.130                       | 0                             | 0                         | 0.000        | 0       |
| 11    | (+)-δ-Cadinene                                 | Moderate                      | Moderate                  | 0.051                  | Accepted                     | -4.469                                            | Positive                         | 7.421                       | 204.190                       | 0                             | 0                         | 0.000        | 0       |
| 12    | (+)-Endo-β-bergamotene                         | PASS                          | PASS                      | 0.063                  | Accepted                     | -4.466                                            | Negative                         | 16.946                      | 204.190                       | 0                             | 0                         | 0.000        | 0       |
| 13    | (1S,2R,4S)-(-)-Bornyl acetate                  | PASS                          | PASS                      | 0.243                  | Accepted                     | -4.552                                            | Moderate                         | 6.063                       | 196.150                       | 2                             | 0                         | 26.300       | 0       |
| 14    | (1S)-1,7,7-Trimethylbicyclo[2.2.1]heptan-2-one | PASS                          | PASS                      | 0.701                  | Accepted                     | -4.582                                            | Negative                         | 13.808                      | 152.120                       | 1                             | 0                         | 17.070       | 0       |
| 15    | (E)-β-Farnesene                                | Fail                          | Fail                      | 0.156                  | Accepted                     | -4.537                                            | Moderate                         | 13.186                      | 204.190                       | 0                             | 0                         | 0.000        | 0       |
| 16    | (E)-α-Bisabolene                               | Fail                          | Fail                      | 0.092                  | Accepted                     | -4.502                                            | Negative                         | 17.581                      | 204.190                       | 0                             | 0                         | 0.000        | 0       |
| 17    | (E)-β-ocimene                                  | PASS                          | PASS                      | 0.678                  | Accepted                     | -4.434                                            | Negative                         | 14.171                      | 136.130                       | 0                             | 0                         | 0.000        | 0       |
| 18    | 1-Octen-3-ol                                   | Fail                          | Fail                      | 0.672                  | Accepted                     | -4.256                                            | Negative                         | 7.650                       | 128.120                       | 1                             | 1                         | 20.230       | 0       |
| 19    | 1S-α-Pinene                                    | PASS                          | PASS                      | 0.114                  | Accepted                     | -4.303                                            | Negative                         | 15.022                      | 136.130                       | 0                             | 0                         | 0.000        | 0       |
| 20    | 2,3-Dimethylaniline                            | PASS                          | PASS                      | 0.583                  | Accepted                     | -4.255                                            | Negative                         | 10.496                      | 121.090                       | 1                             | 2                         | 26.020       | 0       |
| 21    | 2,5-Dimethoxybenzoic acid                      | PASS                          | Moderate                  | 0.885                  | Accepted                     | -4.853                                            | Positive                         | 7.488                       | 182.060                       | 4                             | 1                         | 55.760       | 0       |
| 22    | 3-Carene                                       | PASS                          | PASS                      | 0.132                  | Accepted                     | -4.307                                            | Negative                         | 16.061                      | 136.130                       | 0                             | 0                         | 0.000        | 0       |
| 23    | 4-Terpineol                                    | PASS                          | PASS                      | 0.447                  | Accepted                     | -4.217                                            | Negative                         | 14.345                      | 154.140                       | 1                             | 1                         | 20.230       | 0       |
| 24    | Acetic acid                                    | PASS                          | PASS                      | 0.791                  | Accepted                     | -5.218                                            | Negative                         | 1.609                       | 60.020                        | 2                             | 1                         | 37.300       | 0       |
| 25    | AcetyლეNol                                     | PASS                          | PASS                      | 0.843                  | Accepted                     | -4.453                                            | Moderate                         | 8.457                       | 206.090                       | 3                             | 0                         | 35.530       | 0       |
| 26    | α-Fenchene                                     | PASS                          | PASS                      | 0.099                  | Accepted                     | -4.460                                            | Negative                         | 10.559                      | 136.130                       | 0                             | 0                         | 0.000        | 0       |
| 27    | α-Humulene                                     | Fail                          | No                        | 0.095                  | Accepted                     | -4.425                                            | Negative                         | 8.432                       | 204.190                       | 0                             | 0                         | 0.000        | 0       |
| 28    | α-Terpeneol                                    | PASS                          | PASS                      | 0.527                  | Accepted                     | -4.193                                            | Negative                         | 8.942                       | 154.140                       | 1                             | 1                         | 20.230       | 0       |
| 29    | Apigenin                                       | Fail                          | No                        | 0.856                  | Accepted                     | -4.847                                            | Positive                         | 7.022                       | 270.050                       | 5                             | 3                         | 90.900       | 0       |
| 30    | Apigenin-7-glucuronide                         | Fail                          | No                        | 0.715                  | Rejected                     | -6.376                                            | Positive                         | 1.194                       | 446.080                       | 11                            | 6                         | 187.120      | 0       |
| 31    | β-Cadinene                                     | Fail                          | Moderate                  | 0.060                  | Accepted                     | -4.392                                            | Negative                         | 17.975                      | 204.190                       | 0                             | 0                         | 0.000        | 0       |
| 32    | β-Carotene                                     | Moderate                      | No                        | 0.076                  | Rejected                     | -6.003                                            | Negative                         | 0.229                       | 536.440                       | 0                             | 0                         | 0.000        | 0       |
| 33    | β-Caryophyllene                                | PASS                          | PASS                      | 0.048                  | Accepted                     | -4.517                                            | Negative                         | 9.943                       | 204.190                       | 0                             | 0                         | 0.000        | 0       |
| 34    | β -Pinene                                      | PASS                          | PASS                      | 0.107                  | Accepted                     | -4.460                                            | Negative                         | 10.097                      | 136.130                       | 0                             | 0                         | 0.000        | 0       |
| 35    | Bis-(Acetic acid)                              | Fail                          | No                        | 0.998                  | Rejected                     | -7.722                                            | Positive                         | 12.869                      | 1700.170                      | 46                            | 25                        | 777.980      | 1 alert |
| 36    | Carotene                                       | PASS                          | No                        | 0.036                  | Rejected                     | -5.634                                            | Negative                         | 0.671                       | 536.440                       | 0                             | 0                         | 0.000        | 0       |
| 37    | Carvacrol                                      | Fail                          | PASS                      | 0.671                  | Accepted                     | -4.436                                            | Negative                         | 11.335                      | 150.100                       | 1                             | 1                         | 20.230       | 1 alert |
| 38    | Cis-Anethole                                   | PASS                          | Moderate                  | 0.638                  | Accepted                     | -4.440                                            | Negative                         | 11.146                      | 148.090                       | 1                             | 0                         | 9.230        | 0       |
| 39    | Decanal                                        | Fail                          | PASS                      | 0.456                  | Accepted                     | -4.551                                            | Negative                         | 5.049                       | 156.150                       | 1                             | 0                         | 17.070       | 0       |
| 40    | Dehydro-p-cymene                               | PASS                          | PASS                      | 0.568                  | Accepted                     | -4.344                                            | Moderate                         | 10.755                      | 132.090                       | 0                             | 0                         | 0.000        | 0       |

|    |                            |          |          |       |          |        |          |        |         |    |   |         |         |
|----|----------------------------|----------|----------|-------|----------|--------|----------|--------|---------|----|---|---------|---------|
| 41 | Dipentene                  | Fail     | PASS     | 0.233 | Accepted | -4.320 | Negative | 11.517 | 136.130 | 0  | 0 | 0.000   | 0       |
| 42 | Estragole                  | Moderate | Moderate | 0.577 | Accepted | -4.308 | Negative | 12.054 | 148.090 | 1  | 0 | 9.230   | 0       |
| 43 | Eucalyptol                 | PASS     | PASS     | 0.352 | Accepted | -4.414 | Negative | 8.066  | 154.140 | 1  | 0 | 9.230   | 0       |
| 44 | EugeNol                    | Fail     | PASS     | 0.887 | Accepted | -4.373 | Negative | 14.042 | 164.080 | 2  | 1 | 29.460  | 0       |
| 45 | $\gamma$ -Selinene         | PASS     | PASS     | 0.088 | Accepted | -4.577 | Negative | 13.350 | 204.190 | 0  | 0 | 0.000   | 0       |
| 46 | Geranyl acetate            | PASS     | PASS     | 0.506 | Accepted | -4.420 | Moderate | 9.707  | 196.150 | 2  | 0 | 26.300  | 0       |
| 47 | IsoeugeNol                 | PASS     | Moderate | 0.880 | Accepted | -4.579 | Negative | 13.435 | 164.080 | 2  | 1 | 29.460  | 0       |
| 48 | L-ascorbic acid            | Fail     | Fail     | 0.928 | Accepted | -5.917 | Positive | 9.964  | 176.030 | 6  | 5 | 114.290 | 0       |
| 49 | LiNolenic acid             | Fail     | Fail     | 0.710 | Accepted | -4.631 | Negative | 4.877  | 278.220 | 2  | 1 | 37.300  | 0       |
| 50 | Luteolin 7-O-glucuronide   | Fail     | Fail     | 0.855 | Rejected | -6.471 | Positive | 1.614  | 462.080 | 12 | 7 | 207.350 | 1 alert |
| 51 | MethyleugeNol              | Moderate | PASS     | 0.848 | Accepted | -4.338 | Negative | 11.466 | 178.100 | 2  | 0 | 18.460  | 0       |
| 52 | Molludistin                | Fail     | Fail     | 0.290 | Accepted | -5.776 | Positive | 3.398  | 416.110 | 9  | 5 | 149.820 | 0       |
| 53 | Myrcene                    | PASS     | PASS     | 0.453 | Accepted | -4.402 | Moderate | 13.108 | 136.130 | 0  | 0 | 0.000   | 0       |
| 54 | Nerol                      | Fail     | PASS     | 0.737 | Accepted | -4.299 | Positive | 12.604 | 154.140 | 1  | 1 | 20.230  | 0       |
| 55 | Octadeca-9,12-dienoic acid | Moderate | Fail     | 0.628 | Accepted | -4.733 | Negative | 3.327  | 280.240 | 2  | 1 | 37.300  | 0       |
| 56 | Octadecanoate              | Fail     | Fail     | 0.476 | Accepted | -5.068 | Negative | 2.425  | 284.270 | 2  | 1 | 37.300  | 0       |
| 57 | Oleic acid                 | Moderate | Fail     | 0.546 | Accepted | -4.922 | Negative | 2.573  | 282.260 | 2  | 1 | 37.300  | 0       |
| 58 | Orientin                   | Fail     | Fail     | 0.724 | Rejected | -6.208 | Positive | 5.042  | 448.100 | 11 | 8 | 201.280 | 1 alert |
| 59 | Palmitic acid              | Fail     | Fail     | 0.610 | Accepted | -5.027 | Negative | 2.377  | 256.240 | 2  | 1 | 37.300  | 0       |
| 60 | Thymol                     | Fail     | PASS     | 0.682 | Accepted | -4.387 | Negative | 9.444  | 150.100 | 1  | 1 | 20.230  | 0       |
| 61 | Ursolic acid               | Moderate | PASS     | 0.017 | Accepted | -5.221 | Negative | 3.671  | 456.360 | 3  | 2 | 57.530  | 0       |
